# Supplementary material
Source: Research Square preprint supplement (doi:10.21203/rs.3.rs-8725409/v1)
Supplement: Supplementary file 1 [file 0058596bb854615ef4b7d79c.docx]

**Supplementary figures**


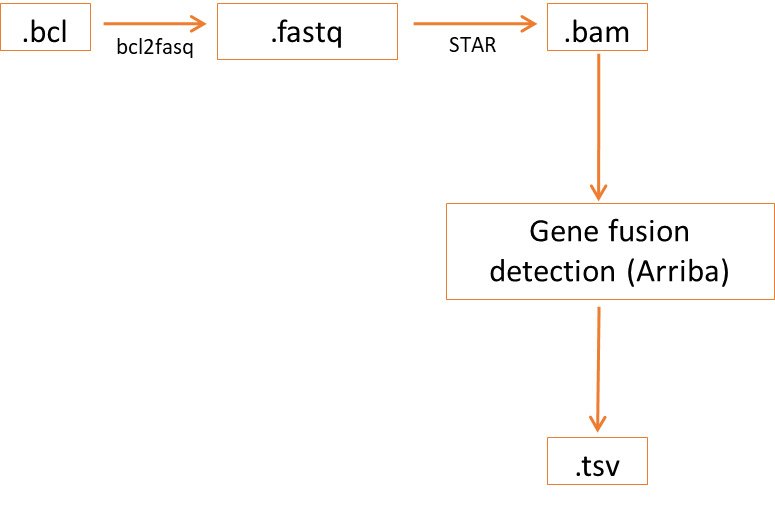


SF1. Schematic presentation of the gene fusion analysis bioinformatic pipeline


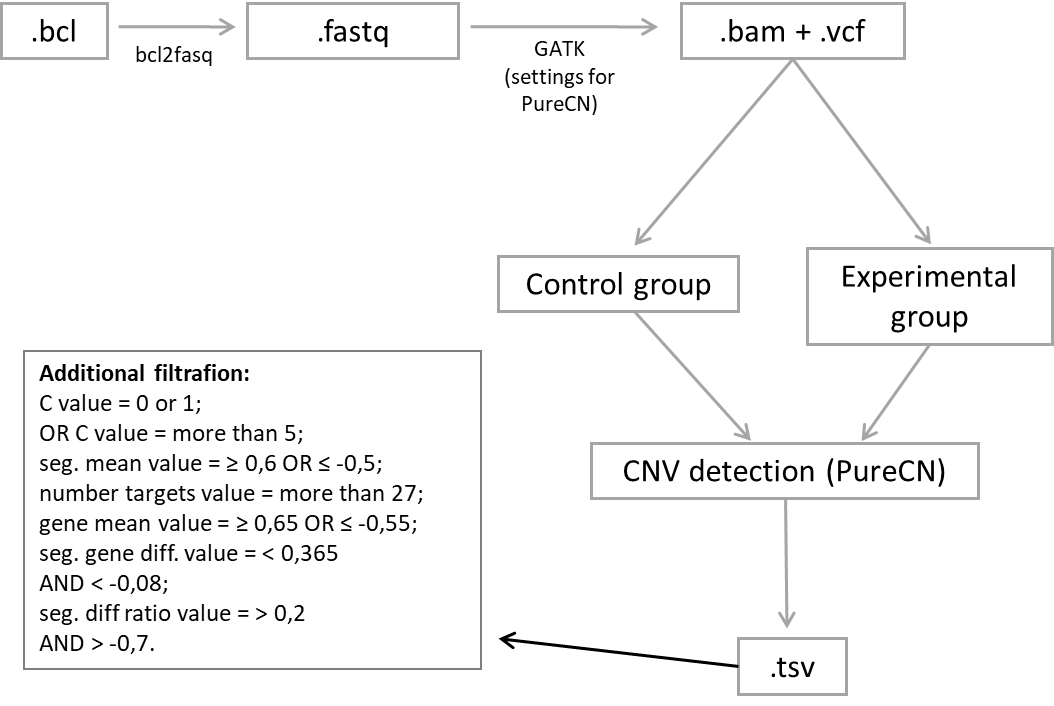


SF 2. Schematic presentation of the copy number variation analysis bioinformatic pipeline


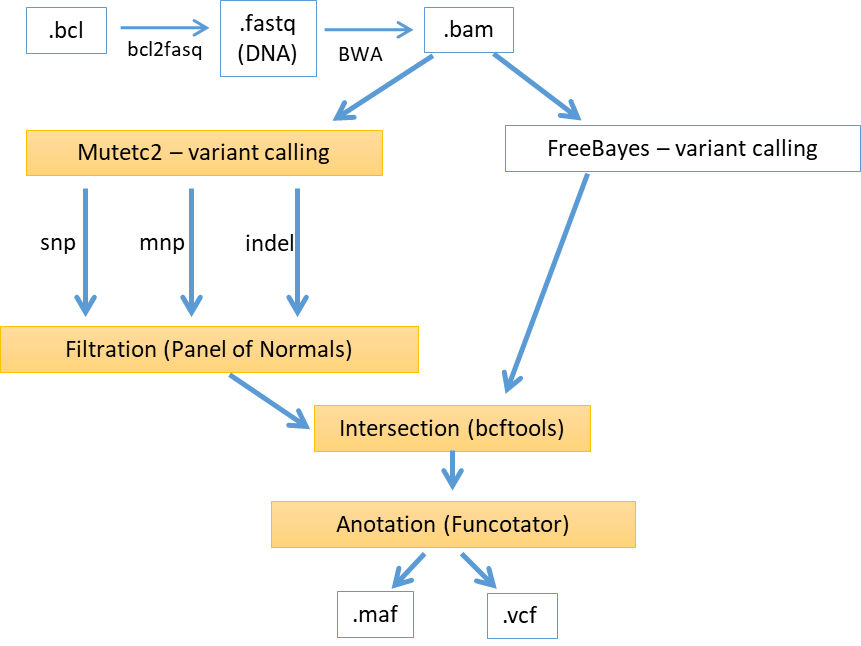


SF 3. Schematic presentation of the single-nucleotide variants analysis bioinformatic pipeline. yellow – the Genome Analysis Toolkit (GATK) package

SF 4. Type of detected aberrations. CNV – copy number variation, SNV - single-nucleotide variant

SF 5. The most frequently altered genes. SNV - single-nucleotide variant


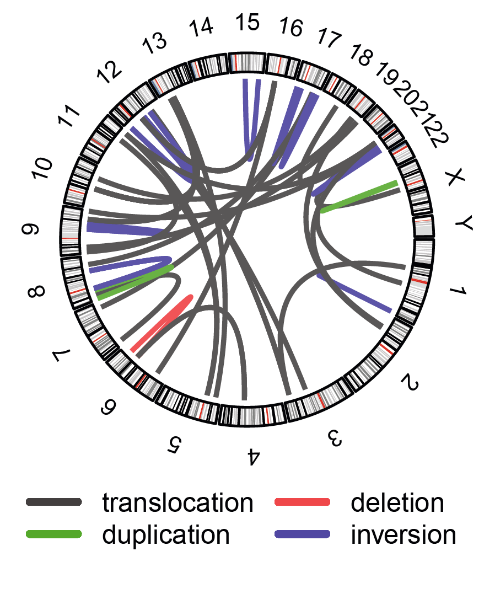


SF6. Circos plot of all gene fusions. grey – translation, blue – inversion, green – duplication, red – deletion

SF7. Type and number of gene fusions detected in the study cohort

**ST 1**. *Gene fusions detected in the study cohort, with coverage > 10%. black – genes with coverage more than 10%, red – genes with coverage less than 10%*

| **Study group** | |
| --- | --- |
| **Gene 1** | **Gene 2** |
| *AXL* | *LOXL4* |
| *NTRK3* | *B2M* |
| *PTCH1* | *NTRK2* |
| *SYNPO2,MYOZ2* | *ROS1* |
| *HMGA2* | *HSPBAP1* |
| *RP11-118B18.1* | *BRAF* |
| *PSD3* | *ETV1* |
| *PHF1* | *MAPK3* |
| *TP53* | *RP11-846F4.11,RP11-260A9.1* |
| *MIR3687,TEKT4P2* | *NOTCH2NL* |
| *STX11* | *ROS1* |
| *SYNPO2,MYOZ2* | *ROS1* |
| *FOXO1* | *TRIO* |
| *ETS1* | *NNT* |
| *FLT1* | *PALM2-AKAP2* |
| *FLT1* | *AKAP2* |
| *FLI1* | *MIR3687,TEKT4P2* |

SF 8. Single-nucleotide variant classification

SF9. Gene fusion in a specific sarcoma subtype. MFS – myxofibrosarcoma, MLPS – myxoid liposarcoma, MPNST - malignant peripheral nerve sheath tumor, PLPS – pleomorphic liposarcoma, UPS – undifferentiated pleomorphic liposarcoma

SF10. Gene amplification in a specific sarcoma subtype. MFS – myxofibrosarcoma, MLPS – myxoid liposarcoma, MPNST - malignant peripheral nerve sheath tumor, PLPS – pleomorphic liposarcoma, UPS – undifferentiated pleomorphic liposarcoma

SF 11. Large deletion in a specific sarcoma subtype. MFS – myxofibrosarcoma, MLPS – myxoid liposarcoma, MPNST - malignant peripheral nerve sheath tumor, PLPS – pleomorphic liposarcoma, UPS – undifferentiated pleomorphic liposarcoma

SF12. Single-nucleotide variant in a specific sarcoma subtype. MFS – myxofibrosarcoma, MLPS – myxoid liposarcoma, MPNST - malignant peripheral nerve sheath tumor, PLPS – pleomorphic liposarcoma, SNV - single-nucleotide variant, UPS – undifferentiated pleomorphic liposarcoma


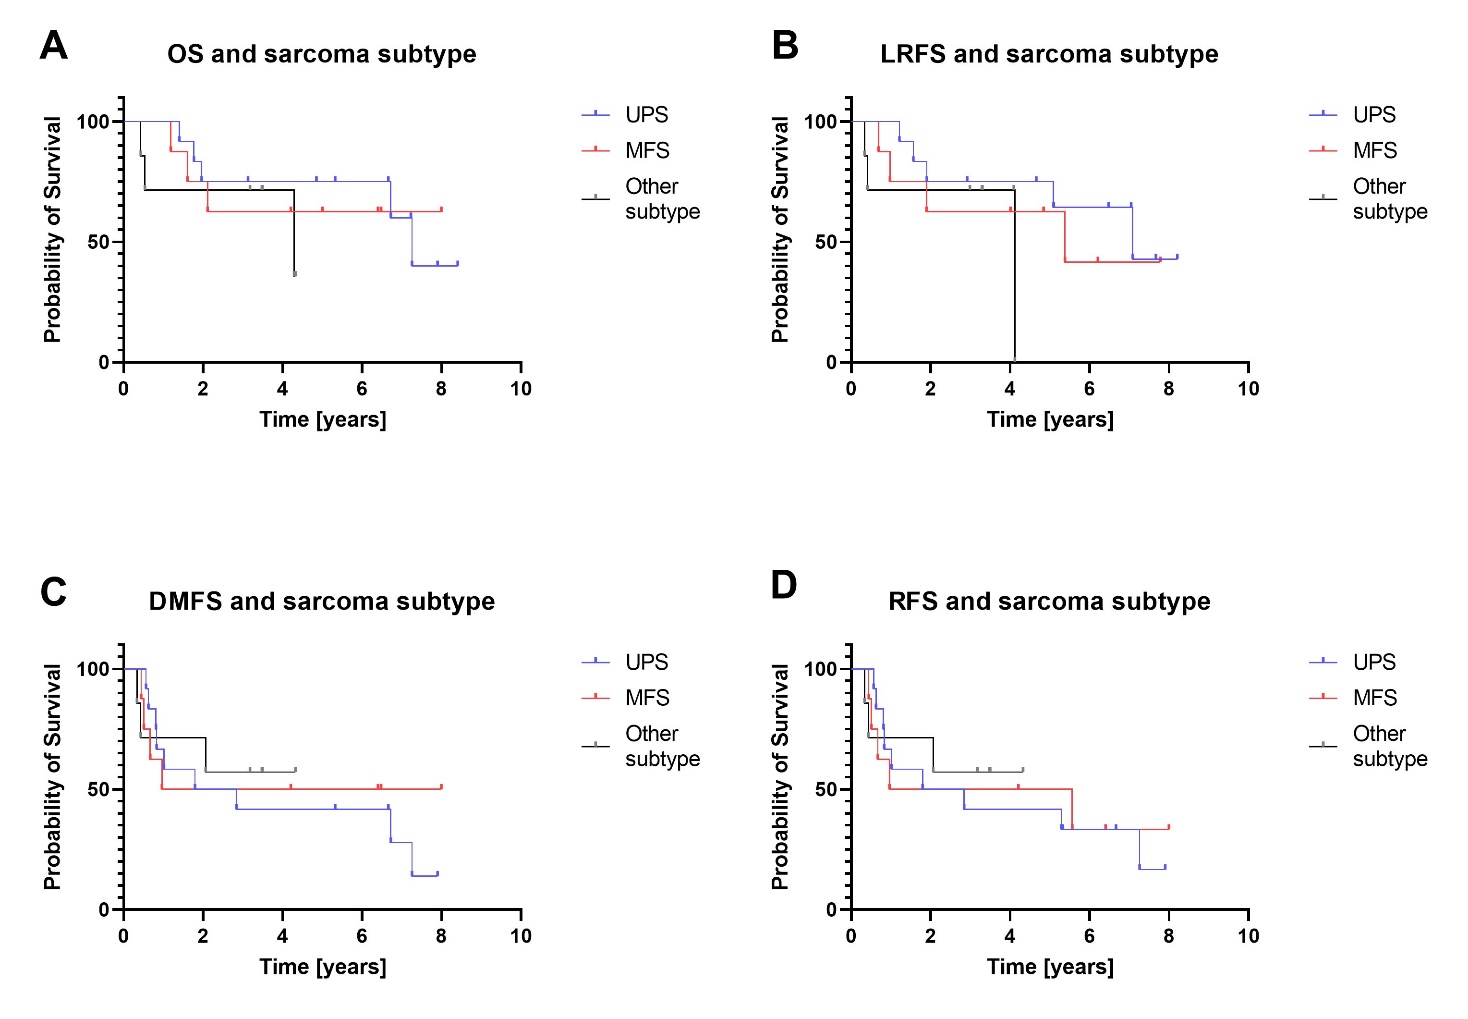


SF13. Survival analysis by sarcoma subtype: (A) Overall survival, (B) Local recurrence-free survival, (C) Progression-free survival. LRFS – local recurrence-free survival, OS – overall survival, PFS - progression-free survival


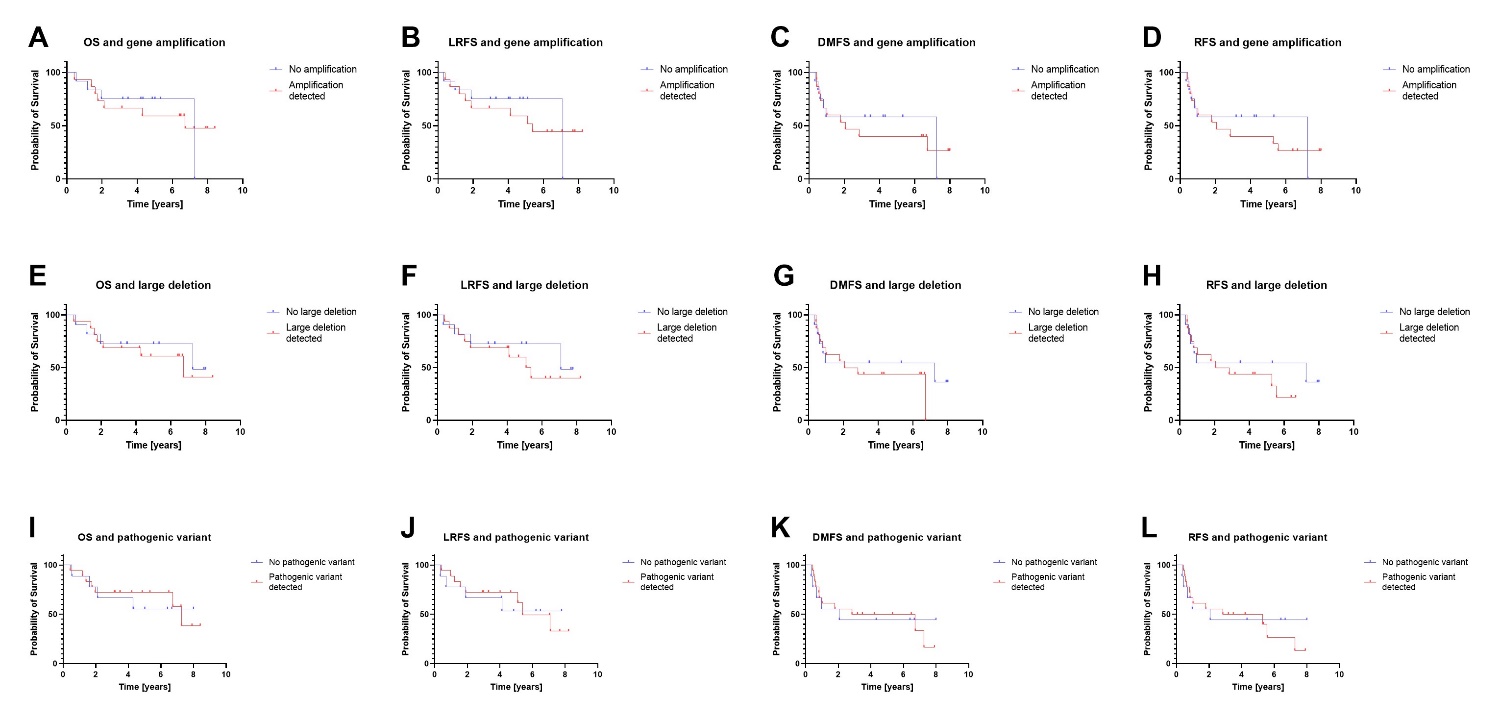


SF14. Survival analysis by genetic aberration: (A) OS by presence of gene amplification, (B) LRFS by presence of gene amplification, (C) DMFS by presence of gene amplification, (D) RFS by presence of gene amplification, (E) OS by presence of large deletion, (F) LRFS by presence of large deletion, (G) DMFS by presence of large deletion, (H) DMFS by presence of large deletion, (I) OS by presence of pathogenic single-nucleotide variant, (J) LRFS by presence of pathogenic single-nucleotide variant, (K) DMFS by presence of pathogenic single-nucleotide variant, (L) RFS by presence of pathogenic single-nucleotide variant. DMFS – distant metastasis-free survival, LRFS – local recurrence-free survival, OS – overall survival, RFS - progression-free survival
